# Supplementary material for: Laboratory blueprints for interstellar searches of aromatic chiral molecules: rotational signatures of styrene oxide
Source: Royal Society of Chemistry journal article supplement (doi:10.1039/d0cp03523h), 2020-01-01
Supplement: d0cp03523h1.zip [file d0cp03523h1.zip]

# Laboratory blueprints for interstellar searches of aromatic chiral molecules: rotational signatures of styrene oxide<sup>†</sup>

## - SUPPLEMENTARY MATERIAL -

Pascal Stahl,<sup>\*a</sup> Benjamin E. Arenas,<sup>b</sup> Sérgio R. Domingos,<sup>b</sup> Guido W. Fuchs,<sup>a</sup> Melanie Schnell,<sup>bc</sup> and Thomas F. Giesen<sup>a</sup>

<sup>a</sup>*Institute of Physics, University of Kassel, Heinrich-Plett-Str. 40, 34132 Kassel, Germany; E-mail: p.stahl@physik.uni-kassel.de*

<sup>b</sup>*Deutsches Elektronen-Synchrotron (DESY), Notkestr. 85, 22607 Hamburg, Germany.*

<sup>c</sup>*Institut für Physikalische Chemie, Christian-Albrechts-Universität zu Kiel, Max-Eyth-Str. 1, 24118 Kiel, Germany.*

## 1 Rotational Analysis of the Vibrationally Excited States of Styrene Oxide

Table 1: Ground state prediction and experimental values from Table 2 (main script) of styrene oxide. Theoretical values are calculated with Gaussian 09 with the B3LYP/aug-cc-pVTZ and B3LYP/def2-TZVP level of theory (anharmonic frequency calculations)

| Ground State          | $E_{\text{harm}} / \text{cm}^{-1}$ | $E_{\text{anharm}} / \text{cm}^{-1}$ | $A / \text{MHz}$ | $B / \text{MHz}$ | $C / \text{MHz}$ |
|-----------------------|------------------------------------|--------------------------------------|------------------|------------------|------------------|
| Experiment            | -                                  | -                                    | 4348.86          | 1124.88          | 951.23           |
| B3LYP/aug-cc-pVTZ     | 30421.650                          | 30075.203                            | 4361.78          | 1116.87          | 945.91           |
| Experiment-Prediction | -                                  | -                                    | -12.92           | 8.01             | 5.32             |
| B3LYP/def2-TZVP       | 30394.107                          | 30185.962                            | 4359.15          | 1117.78          | 946.51           |
| Experiment-Prediction | -                                  | -                                    | -10.29           | 7.10             | 4.72             |

Table 2: The three lowest energy vibrational modes  $\nu$  and corresponding rotational constants  $A$ ,  $B$ ,  $C$  of styrene oxide calculated with Gaussian 09 with the B3LYP/aug-cc-pVTZ and B3LYP/def2-TZVP level of theory (anharmonic frequency calculations). Additionally, the experimentally adjusted corrections for the predictions (subscript *adj*) are given with the corrections obtained from the difference of the ground state rotational constants and the calculated ground state constants from Tables 2 (main script) and S1

| $\nu$             | $A / \text{MHz}$ | $B / \text{MHz}$ | $C / \text{MHz}$ | $A_{\text{adj}} / \text{MHz}$ | $B_{\text{adj}} / \text{MHz}$ | $C_{\text{adj}} / \text{MHz}$ |
|-------------------|------------------|------------------|------------------|-------------------------------|-------------------------------|-------------------------------|
| B3LYP/aug-cc-pVTZ |                  |                  |                  |                               |                               |                               |
| 43                | 4380.63          | 1116.04          | 944.92           | 4367.71                       | 1124.05                       | 950.23                        |
| 44                | 4348.01          | 1117.48          | 946.56           | 4335.09                       | 1125.49                       | 951.88                        |
| 45                | 4357.12          | 1116.37          | 945.85           | 4344.21                       | 1124.38                       | 951.16                        |
| B3LYP/def2-TZVP   |                  |                  |                  |                               |                               |                               |
| 43                | 4376.85          | 1116.97          | 945.61           | 4366.56                       | 1124.10                       | 950.32                        |
| 44                | 4345.97          | 1118.41          | 947.22           | 4335.68                       | 1125.50                       | 951.94                        |
| 45                | 4355.12          | 1117.30          | 946.38           | 4344.83                       | 1124.39                       | 951.10                        |

Table 3: Harmonic and anharmonic vibrational energies in units of  $\text{cm}^{-1}$  of the three lowest normal modes  $\nu_{45}$ ,  $\nu_{44}$ , and  $\nu_{43}$  of SO with respect to the ground state calculated at B3LYP/aug-cc-pVTZ and B3LYP/def2-TZVP levels of theory

|            | B3LYP/aug-cc-pVTZ |                     | B3LYP/def2-TZVP   |                     |
|------------|-------------------|---------------------|-------------------|---------------------|
|            | $E_{\text{harm}}$ | $E_{\text{anharm}}$ | $E_{\text{harm}}$ | $E_{\text{anharm}}$ |
| $\nu_{45}$ | 58.74             | 56.40               | 55.05             | 71.93               |
| $\nu_{44}$ | 148.56            | 146.68              | 145.26            | 152.89              |
| $\nu_{43}$ | 193.76            | 191.13              | 195.20            | 195.38              |

## 2 Rotational Partition Functions of Styrene Oxide

Table 4: Rotational partition function  $Q$  of  $\text{C}_6\text{H}_5\text{C}_2\text{H}_3\text{O}$  for different temperatures  $T$  calculated by PGOPHER with  $J_{\text{max}}=120$

| Temperature $T$ /K | $Q$        | $\log_{10}(Q)$ |
|--------------------|------------|----------------|
| 1.6                | 159.672    | 2.2032         |
| 10                 | 2475.157   | 3.3936         |
| 30                 | 12849.097  | 4.1089         |
| 50                 | 27642.954  | 4.4416         |
| 100                | 78186.156  | 4.8931         |
| 150                | 143651.857 | 5.1573         |
| 200                | 221194.877 | 5.3310         |
| 250                | 309172.207 | 5.4616         |
| 270                | 347025.170 | 5.5404         |
| 300                | 406476.183 | 5.6090         |
| 330                | 468988.808 | 5.6712         |
| 360                | 534421.420 | 5.7279         |
